# Supplementary material for: An overview on animal/human biomass-derived carbon dots for optical sensing and bioimaging applications
Source: Royal Society of Chemistry journal article supplement (doi:10.1039/d3ra06976a), 2023-01-01
Supplement: d3ra06976a1.pdf [file d3ra06976a1.pdf]

# An overview on animal/human biomass-derived carbon dots for optical sensing and bioimaging applications

Prashant Dubey

Centre of Material Sciences, Institute of Interdisciplinary Studies (IIDS), University of Allahabad, Prayagraj-211002, Uttar Pradesh (INDIA)

Email: [pdubey@allduniv.ac.in](mailto:pdubey@allduniv.ac.in), [pdubey.au@gmail.com](mailto:pdubey.au@gmail.com)

**Table S1** Optical results of CDs obtained from various animal/human biomasses.

| Source                                      | $\lambda_{\text{abs}}$ (nm) |                                         | $\lambda_{\text{ex}}$ (nm) | $\lambda_{\text{em}}$ (nm) | Color in UV light | Nature of PL | Origin of PL | $\tau_{\text{av}}$ (ns) <sup>decay behavior</sup> | Ref.  |
|---------------------------------------------|-----------------------------|-----------------------------------------|----------------------------|----------------------------|-------------------|--------------|--------------|---------------------------------------------------|-------|
|                                             | $\pi \rightarrow \pi^*$     | $n \rightarrow \pi^*$ or surface states |                            |                            |                   |              |              |                                                   |       |
| <b>Animal biomass-derived CDs</b>           |                             |                                         |                            |                            |                   |              |              |                                                   |       |
| Egg white/yolk                              | 275                         |                                         | 360                        | 420                        | B                 | EWD          | (ii)         | 6.37 <sup>2</sup>                                 | [126] |
| Egg shell membrane                          | Featureless                 |                                         | 275                        | 450                        | B                 | —            | —            | —                                                 | [127] |
| Egg shell membrane                          | 220                         | 320                                     | 350                        | 420                        | B                 | EWD          | (ii)         | 6.36 <sup>2</sup>                                 | [128] |
| Egg white                                   | 260–290                     |                                         | 315                        | 420                        | B                 | EWD          | (ii)         | 9.1                                               | [129] |
| Egg white (albumin)                         | 218                         | 276                                     | 333                        | 412                        | —                 | EWD          | (i), (ii)    | 7.2–8.7 <sup>2</sup>                              | [130] |
| Egg white                                   | Featureless                 |                                         | 300                        | 395                        | B                 | EWD          | (i), (ii)    | 6.5                                               | [131] |
| Egg white                                   | 270                         | —                                       | 340                        | 420                        | B                 | EWD          | —            | —                                                 | [132] |
| Egg white                                   | 204, 270                    | > 300                                   | 360                        | 441                        | B                 | EWD          | (ii)         | —                                                 | [133] |
| Pigeon egg white                            | —                           | 250–300                                 | 340                        | 400                        | B                 | EWD          | (ii)         | —                                                 | [134] |
| Pigeon egg yolk                             | 220–240                     | —                                       | 340                        | 400                        | B                 | EWD          | (ii)         | —                                                 |       |
| Egg yolk oil                                | 270                         | —                                       | 200–400                    | 420                        | B                 | EWID         | —            | —                                                 | [135] |
| Egg yolk                                    | —                           | 290                                     | 330                        | ~ 400                      | B                 | EWD          | (ii)         | 2.5 <sup>2</sup>                                  | [136] |
| Egg yolk                                    | 275                         |                                         | 332                        | 408                        | B                 | EWD          | —            | —                                                 | [137] |
| <i>Bombyx mori</i> silk                     | 278                         | —                                       | 370                        | 450                        | B-G               | EWD          | (ii)         | 4.23 <sup>3</sup>                                 | [138] |
|                                             |                             |                                         | 780                        | 412                        |                   | UC           |              |                                                   |       |
| Cocoon silk + H <sub>2</sub> O <sub>2</sub> | —                           | 268, 320                                | 370                        | 438                        | B                 | EWD          | (ii)         | 3.99 <sup>2</sup>                                 | [139] |
| Silkworm chrysalis                          | 276                         | 317                                     | 350                        | 420                        | B                 | EWD          | (ii)         | —                                                 | [140] |
| <i>Bombyx mori</i> silk + CA                | 267                         | 314                                     | 360                        | 425                        | B                 | EWD          | (i), (ii)    | —                                                 | [141] |
| Spider silk                                 | 272                         | 333                                     | 370                        | 452                        | B                 | EWD          | —            | 6.43 <sup>3</sup>                                 | [142] |
| Silk fibroin                                | 272                         | 320                                     | 340                        | ~ 420                      | B                 | EWD          | —            | —                                                 | [143] |
| Silk fibroin                                | 275                         | 330                                     | 330                        | 420                        | B                 | EWD          | (i)          | 1.94 <sup>2</sup>                                 | [144] |
|                                             |                             |                                         | 900                        | ~ 550                      |                   | UC           |              |                                                   |       |
| Silk sericin                                | 215, 245, 286,              | 320                                     | 240–340                    | ~ 420                      | B                 | EWID         | (i)          | 5.62 <sup>2</sup>                                 | [145] |
| Silk sericin                                | 215                         | 281                                     | 350                        | 420                        | B                 | EWD          | (i), (ii)    | —                                                 | [146] |
| Silk fibroin + LMWC                         | 275                         | 320–350                                 | 350                        | ~ 420                      | B                 | EWD          | (i)          | —                                                 | [147] |
| Barbeque beef                               | Featureless                 |                                         | 440                        | 520                        | —                 | EWD          | (ii)         | —                                                 | [148] |
| Hamburger                                   | 200–250                     | 250–350                                 | 320                        | 380                        | B                 | EWD          | (ii)         | 6.49 <sup>1</sup>                                 | [149] |
| Pike eel fish                               | —                           | 335                                     | 410                        | 475                        | S                 | EWD          | (ii)         | 6.89 <sup>2</sup>                                 | [150] |
| Pike eel fish                               | 278                         | 335                                     | 405                        | 465                        | C                 | EWD          | (i), (ii)    | 7.17 <sup>2</sup>                                 | [151] |
| Lamb                                        | —                           | 260                                     | 370                        | 426                        | B                 | EWD          | (ii)         | 8.05 <sup>2</sup>                                 | [152] |
| Lamb                                        | 240                         | 325                                     | 330                        | 385                        | B                 | EWD          | (ii)         | 9.1 <sup>2</sup>                                  | [153] |
| Lamb                                        | 200–250                     | 320                                     | 400                        | 455                        | B                 | EWD          | (ii)         | 7.96 <sup>3</sup>                                 | [154] |

|                                          |             |          |     |       |     |      |           |                        |       |
|------------------------------------------|-------------|----------|-----|-------|-----|------|-----------|------------------------|-------|
| Duck                                     | 239         | —        | 360 | 435   | B   | EWD  | (ii)      | 10.47 <sup>2</sup>     | [155] |
| Duck                                     | 239         | —        | 370 | ~ 435 | B   | EWD  | (ii)      | 7.65 <sup>2</sup>      | [156] |
| Chicken breast                           | 250         | —        | 320 | 385   | B   | EWD  | (ii)      | 4.8 <sup>2</sup>       | [157] |
| Chicken                                  | —           | 350      | 375 | 460   | B   | EWD  | (i), (ii) | 10.57 <sup>2</sup>     | [158] |
| Chicken breast                           | —           | —        | —   | —     | —   | —    | —         | —                      | [159] |
| Chicken                                  | 245–255     | —        | 370 | 440   | —   | EWD  | (ii)      | 7.93 <sup>2</sup>      | [160] |
| Mackerel fish                            | 278         | 329      | 380 | 451   | B   | EWD  | (ii)      | 9.1 <sup>2</sup>       | [161] |
| Mackerel fish                            | ~ 220       | —        | —   | —     | B   | —    | —         | 7.719                  | [162] |
| Salmon fish                              | 241         | —        | —   | —     | B   | —    | —         | 6.43                   | [163] |
| Pork                                     | ~ 260       | ~ 320    | 380 | 460   | C   | EWD  | (ii)      | 9.53 <sup>2</sup>      | [164] |
| Beef                                     | Featureless | —        | 360 | ~ 460 | —   | EWD  | —         | 8.78 <sup>2</sup>      | [165] |
| Honey                                    | 278         | —        | 338 | 420   | B   | EWD  | —         | —                      | [166] |
|                                          |             |          | 700 | 435   |     | UC   |           |                        |       |
| Rapeseed bee pollen                      | 280         | —        | 360 | 435   | B-G | EWD  | (ii)      | 7.28 <sup>2</sup>      | [167] |
| Camellia bee pollen                      | "           | —        | —   | —     | "   | EWD  | —         | 7.54 <sup>2</sup>      |       |
| Lotus bee pollen                         | "           | —        | —   | —     | "   | EWD  | —         | 7.61 <sup>2</sup>      |       |
| Bee pollen                               | —           | —        | 340 | 430   | B   | EWD  | (ii)      | —                      | [168] |
| Rapeseed bee pollen                      | 270         | —        | 360 | 432   | B   | EWD  | (i)       | —                      | [169] |
| Honey                                    | 280         | —        | 360 | 456   | B-G | EWD  | —         | 4.67 <sup>2</sup>      | [170] |
| Honey + Garlic extract + NH <sub>3</sub> | 271         | 315      | 330 | 424   | B   | EWD  | (i), (ii) | —                      | [171] |
| Bee pollen (water)                       | ~275        | —        | 365 | ~ 420 | B   | EWD  | (i), (ii) | 2.97                   | [172] |
| Bee pollen (ethanol)                     | ~275        | —        | 365 | ~ 420 | B   | EWD  | (i), (ii) | 2.92                   |       |
| Shrimp egg                               | 295         | 345      | 320 | 420   | B   | EWD  | —         | —                      | [173] |
| Prawn shell                              | 280         | 330      | 330 | 405   | B   | EWD  | (ii)      | —                      | [174] |
| Prawn shell                              | 265, 345    | —        | 345 | 417   | B   | —    | —         | —                      | [175] |
| Prawn shell + Urea                       | 275         | 335      | 355 | 415   | B   | EWD  | (ii)      | —                      | [176] |
| Dried shrimp                             | 321         | —        | 430 | 475   | B   | EWD  | (i), (ii) | 7.53 <sup>3</sup>      | [177] |
| Crab shell + GdCl <sub>3</sub>           | 235, 275    | 350      | 350 | 425   | B   | EWD  | (i), (ii) | —                      | [178] |
| Crab shell                               | —           | 260      | 380 | ~ 450 | B   | EWD  | (i), (ii) | —                      | [179] |
| Crab shell                               | 240         | 340      | 340 | 412   | —   | EWD  | (i), (ii) | —                      | [180] |
| Crab shell                               | 265         | ~ 330    | 330 | 420   | G   | EWD  | (i), (ii) | —                      | [181] |
| Shrimp shell                             | —           | —        | —   | —     | —   | —    | —         | —                      | [182] |
| Shrimp shell                             | —           | —        | 350 | ~ 400 | —   | EWD  | (ii)      | —                      | [183] |
| Shrimp shell                             | 265         | —        | 355 | 450   | G   | EWD  | —         | —                      | [184] |
| Crayfish shell                           | 265         | —        | 372 | 446   | B   | EWID | —         | 1.72                   | [185] |
| Crayfish shell                           | 273         | 364      | 360 | 440   | B   | EWD  | (i), (ii) | 8.38                   | [186] |
| Crayfish shell                           | 273         | —        | 350 | 430   | B   | EWD  | (i), (ii) | —                      | [187] |
| Mussel seafood                           | 260         | —        | 370 | 437.5 | B   | EWD  | (i), (ii) | 7.07 <sup>2</sup>      | [188] |
| Milk                                     | 280         | —        | 360 | 454   | B-G | EWD  | (ii)      | 1.61 <sup>3</sup>      | [189] |
| Milk                                     | 275         | —        | 380 | 466   | B-G | EWD  | (i), (ii) | 5.54–6.07 <sup>3</sup> | [190] |
|                                          |             |          | 850 | 506   |     | UC   |           |                        |       |
| Milk + L-cysteine                        | 274         | 310      | 340 | 430   | B-G | EWD  | "         | 5.07–5.47 <sup>3</sup> |       |
|                                          |             |          | 850 | 506   |     | UC   |           |                        |       |
| Milk + urea                              | 274         | 310      | 320 | 435   | B-G | EWD  | "         | 5.20–5.85 <sup>3</sup> |       |
|                                          |             |          | 760 | 456   |     | UC   |           |                        |       |
| Cow milk                                 | 274         | —        | 379 | 448   | B   | EWD  | (ii)      | 8.9 <sup>3</sup>       | [191] |
| Cow milk                                 | 274         | —        | —   | —     | —   | —    | —         | —                      | [192] |
| Milk                                     | 275         | —        | 400 | 480   | B   | EWD  | (ii)      | 6.88–7.20 <sup>3</sup> | [193] |
| Milk                                     | —           | —        | 365 | 450   | B   | EWD  | —         | 5.06                   | [194] |
| Milk                                     | 240         | 400, 450 | 370 | 450   | C   | EWD  | (ii)      | —                      | [195] |

|                                               |             |         |         |          |     |      |           |                    |       |
|-----------------------------------------------|-------------|---------|---------|----------|-----|------|-----------|--------------------|-------|
| Milk powder + FeCl <sub>3</sub>               | —           | 281     | 370     | 460      | B   | EWD  | (ii)      | —                  | [196] |
| Cow milk                                      | 280±3       |         | 300     | ~ 420    | —   | —    | —         | —                  | [197] |
| Cow milk                                      | 275         | 330     | 475     | 550      | —   | EWD  | (i), (ii) | —                  | [198] |
| Cow milk                                      | 275         | —       | 360     | 440      | B   | EWD  | —         | —                  | [199] |
| Milk powder + Methionine                      | 230         | 315     | 360–410 | ~ 470    | B   | EWID | —         | 12.78 <sup>2</sup> | [200] |
| Pasteurized milk                              | 245         | 302     | 370     | 455      | B   | EWD  | (i), (ii) | 4.89 <sup>2</sup>  | [201] |
| Expired milk                                  | 280         | —       | 360     | 440      | B   | EWD  | (ii)      | —                  | [202] |
| Denatured milk                                | 290         | —       | 350     | 425      | B   | EWD  | (i), (ii) | 7.92 <sup>2</sup>  | [203] |
| Denatured sour milk                           | 290         | 300–400 | 350     | 430      | B   | EWD  | (i), (ii) | —                  | [204] |
| Goose feather                                 | 270         | —       | 340     | ~ 420    | B   | EWD  | (ii)      | —                  | [205] |
| Pigeon feather                                | Featureless |         | 330     | 400      | B   | EWD  | (ii)      | —                  | [134] |
| Chicken feather                               | 215         | 275     | —       | —        | —   | —    | —         | —                  | [206] |
| Carbonized hen feather + Zn salt              | —           | —       | 316     | 390      | —   | EWD  | (i), (ii) | 2.199 <sup>3</sup> | [207] |
| Carbonized hen feather + Mg salt              |             |         | 320     | 412      |     |      | "         | 1.839 <sup>3</sup> |       |
| Pig skin                                      | 260         | 293     | 460     | 521      | G   | EWD  | —         | 8.89 <sup>2</sup>  | [208] |
| Pig skin                                      | Featureless |         | 320     | 380      | B   | EWD  | (i), (ii) | —                  | [209] |
| Pork                                          | 235         | 281     | 310     | 412      | B   | EWD  | —         | —                  | [210] |
| Pig skin collagen                             | 265         | 320     | 350     | 435      | B   | EWD  | (i), (ii) | 3.86 <sup>2</sup>  | [211] |
|                                               |             |         | 780     | 510      |     | UC   |           |                    |       |
| Pork rib bone                                 | 259         | —       | 300–400 | 453      | —   | EWID | (i)       | 3.86               | [212] |
| Pork liver                                    | 263         | —       | 329     | 410      | B   | EWD  | —         | 4.53               | [213] |
| Chicken drumstick                             | —           | 280     | 330     | 417      | B   | EWD  | (i), (ii) | —                  | [214] |
| Bovine bone                                   | 259         | —       | 310–400 | 453      | —   | EWID | (i)       | 5.272              | [215] |
| Pork bone                                     | 259         | —       | "       | "        |     | "    |           | 2.653              |       |
| Sheep bone                                    | 259         | —       | "       | "        |     | "    |           | 2.882              |       |
| GGEC                                          | —           | 273     | 350     | 420      | B   | EWD  | (ii)      | 12.9               | [216] |
| Chicken cartilage                             | 252         | 330     | 360     | 435      | —   | EWD  | (i), (ii) | 9.76 <sup>2</sup>  | [217] |
| Chicken bone                                  | —           | —       | 380     | 465      | B   | EWD  | (ii)      | —                  | [218] |
| Cow manure                                    | —           | —       | 360     | ~ 450    | B   | EWD  | (ii)      | —                  | [219] |
| Cow manure                                    | —           | 284     | 360     | 475      | —   | EWD  | (i), (ii) | —                  | [220] |
| Pigeon manure                                 | 225         | 285     | 350     | 400      | B   | EWD  | (ii)      | —                  | [134] |
| Pigeon manure                                 | 230, 289    | 332     | 334     | ~ 470    | B   | EWD  | (ii)      | —                  | [221] |
| Fish scale (grass carp)                       | 266         | 316     | 360     | 430      | V-B | EWD  | (i), (ii) | —                  | [222] |
| Fish scale (grass carp)                       | 270         | 300–400 | 200–290 | 420      | B   | EWID |           | 4.43 <sup>1</sup>  | [223] |
|                                               |             |         | 360     | 440      |     | EWD  | (i), (ii) |                    |       |
|                                               |             |         | 700     | 440      |     | UC   |           |                    |       |
| Fish scale (grass carp)                       | 220         | 287     | 355     | 441      | B   | EWD  | —         | —                  | [224] |
|                                               |             |         | 800     | 415      |     | UC   |           |                    |       |
| Fish scale (crucian carp)                     | 263         | 300–350 | 220–290 | 425      | B   | EWID |           | 6.2 <sup>2</sup>   | [225] |
|                                               |             |         | 350     | 440      |     | EWD  | (i), (ii) |                    |       |
|                                               |             |         | 700     | 440      |     | UC   |           |                    |       |
| Fish scale ( <i>Lethrinus lentjan</i> )       | —           | 280     | 340     | ~ 420    | B   | EWD  | (i), (ii) | —                  | [226] |
| Fish scale ( <i>Ctenopharyngodon idella</i> ) | 270         |         | 250–405 | 335, 460 | B   | EWID | (iii)     | —                  | [227] |
| Fish scale ( <i>Dicentrarchus labrax</i> )    | 250         | 350     | 365     | 450      | —   | EWD  | (ii)      | 6.98 <sup>3</sup>  | [228] |
| Fish scale ( <i>Dicentrarchus labrax</i> )    | —           | —       | —       | —        | —   | —    | —         | —                  | [229] |
| Fish scale ( <i>Labeo rohita</i> )            | 216         | 263     | 360     | 434      | B-G | EWD  | (i), (ii) | —                  | [230] |
| Fish scale (silver carp)-HT                   | 250–290     | —       | 360     | 430      | B   | EWD  | (i), (ii) | —                  | [231] |

|                                        |             |          |          |          |     |      |           |                     |       |
|----------------------------------------|-------------|----------|----------|----------|-----|------|-----------|---------------------|-------|
| Fish scale (silver carp)-MW            | "           |          | 280–350  | 400      | "   | EWID | (ii)      | —                   |       |
| Shark cartilage (chondroitin sulphate) | 287         | 324      | 390      | ~ 475    | B   | EWD  | (ii)      | —                   | [232] |
| Carp roe                               | —           | 255      | 365      | 443      | B   | EWD  | —         | 3.56                | [233] |
| Fish scale collagen peptides-HT        | < 300       | —        | 350      | 420      | B   | EWD  | (i), (ii) | —                   | [234] |
| Fish scale collagen peptides-MW        | "           |          | 360      | 430      | "   | "    | "         | —                   |       |
| Sheep wool                             | 282         | 310      | 340      | 402      | B   | EWD  | —         | 6.8491 <sup>2</sup> | [235] |
| Sheep wool                             | 270         | —        | 360      | 460      | B   | EWD  | (i), (ii) | 7.86 <sup>3</sup>   | [236] |
| Sheep wool                             | 272         | 340      | 350      | 430      | —   | EWD  | —         | —                   | [237] |
| Wool keratin                           | 270         | 323      | 365      | 434      | B   | EWD  | (i), (ii) | 9.90 <sup>3</sup>   | [238] |
| <b>Human biomass-derived CDs</b>       |             |          |          |          |     |      |           |                     |       |
| Hair fiber                             | 323         |          | 330      | 383      | P-B | EWD  | (ii)      | 4.72 <sup>2</sup>   | [239] |
|                                        |             |          | 655      | ~ 383    |     | UC   |           |                     |       |
|                                        | 300         |          | 353      | 450      | B   | EWD  | "         | 5.34 <sup>2</sup>   |       |
|                                        |             |          | 726      | ~ 450    |     | UC   |           |                     |       |
|                                        | 295         |          | 369      | 470      | G-B | EWD  | "         | 5.17 <sup>2</sup>   |       |
|                                        |             |          | 731      | ~ 470    |     | UC   |           |                     |       |
| Hair                                   | 270         | 330      | 360      | 430      | B   | EWD  | (i), (ii) | 2.83 <sup>2</sup>   | [240] |
| Hair                                   | 275         | 330      | 330      | 415      | B   | EWD  | —         | 5.15                | [241] |
| Hair                                   | Featureless |          | 320      | 380      | B   | EWD  | (i), (ii) | —                   | [209] |
| Hair-AT                                | 280         | —        | 435      | 400–500  | B   | —    | (ii)      | 8.21 <sup>3</sup>   | [242] |
| Hair-MW                                | 230         | —        | 435      | 400–500  | B   | —    | "         | 5.99 <sup>3</sup>   |       |
| Hair                                   | 285         | 330      | 380      | 450      | B   | EWD  | —         | 2.19                | [243] |
|                                        | (n→σ*)      |          |          |          |     |      |           |                     |       |
| Urine (unmodified diet)                | 330, 390    |          | 325      | 392      | —   | EWD  | —         | —                   | [244] |
| Urine (vitamin C supplemented)         | 330, 385    |          | 350      | 427      | —   | EWD  | —         | —                   |       |
| Urine (asparagus rich diet)            | 325, 400    |          | 425      | 500      | —   | EWD  | —         | —                   |       |
| Urine + Citron fruit juice             | —           | 333      | 355      | ~ 440    | B   | EWD  | (i), (ii) | 7.7 <sup>3</sup>    | [245] |
| Urine-GC                               | —           | 275, 325 | 400      | ~ 450    | B   | EWD  | (ii)      | 6.83 <sup>3</sup>   | [246] |
| Urine-HT                               | —           | 232, 290 | 380      | ~ 450    | B   | EWD  | "         | 7.60 <sup>3</sup>   |       |
| Fingernail                             | —           | 300      | 320      | 380      | B   | EWD  | (ii)      | —                   | [247] |
| Fingernail                             | 275         | 330      | 330/ 370 | 380/ 450 | B   | EWD  | (ii)      | —                   | [248] |
| Fingernail                             | —           | 301, 371 | 360      | ~ 470    | B-G | EWD  | (i), (ii) | —                   | [249] |

**Note:** B: blue, B-G: bluish-green, S: sapphire, C: cyan, G: green, V-B: violet-blue, P-B: purplish-blue, G-B: greenish-blue, EWD: excitation wavelength dependent, UC: up-conversion, EWID: excitation wavelength independent, <sup>1</sup>: mono-exponential fitting, <sup>2</sup>: bi-exponential fitting, <sup>3</sup>: tri-exponential fitting.

**Table S2** Cytotoxicological assessment of CDs derived from various animal/human biomasses under different cell lines.

| Source                  | Cell line | Assay | Amount of CDs (mg mL <sup>-1</sup> ) | Time (h) | Cell viability (%) | Ref.  |
|-------------------------|-----------|-------|--------------------------------------|----------|--------------------|-------|
| Egg white               | HeLa, KB  | MTT   | 5–80                                 | 24       | 80–100             | [129] |
| Egg white (albumin)     | Bcap-37   | MTT   | 0.4–2.0                              | 24       | 98–94              | [130] |
| Egg white               | BEAS-2B   | MTT   | 1.5                                  | 24       | ~ 80               | [132] |
| <i>Bombyx mori</i> silk | A549      | CCK-8 | 1.0                                  | 24       | > 100              | [138] |
| Silkworm chrysalis      | HeLa      | MTT   | 15.0                                 | 20       | > 80               | [140] |

|                                         |                                          |                   |                        |                  |                                                  |       |
|-----------------------------------------|------------------------------------------|-------------------|------------------------|------------------|--------------------------------------------------|-------|
| Spider silk                             | HepG2                                    | MTT               | 1.0                    | 24               | 88                                               | [142] |
| Silk fibroin                            | KB                                       | MTT               | 1.0                    | 24               | > 95                                             | [143] |
| Silk fibroin + LMWC                     | MCF-7, HeLa, HEK-293                     | MTT               | 0.3                    | 48               | > 100, ~ 80, > 100                               | [147] |
| Hamburger                               | MC3T3-E1                                 | MTT               | 3.2                    | 24               | 90 (220 °C), 85 (260 °C), 79 (300 °C)            | [149] |
| Pike eel fish                           | MC3T3-E1                                 | MTT               | 20.0                   | 24               | 96.5                                             | [150] |
| Pike eel fish                           | MC3T3-E1                                 | MTT               | 20.0                   | 24               | ~ 100                                            | [151] |
| Lamb                                    | HepG2                                    | Annexin V-FITC/PI | 2.0                    | 4                | 93.3 (200 °C), 94.8 (300 °C), 92.1 (350 °C)      | [153] |
| Lamb                                    | PC-12                                    | Annexin V-FITC/PI | 4.0                    | 24               | 95.0 (CD-1), 74.0 (CD-2), 45.0 (CD-3)            | [154] |
| Duck                                    | PC-12                                    | MTT               | 1.0                    | 36               | 91.2                                             | [156] |
| Chicken                                 | HepG2                                    | MTT               | 4.0                    | 24               | 85 (200 °C), 63 (250 °C), 67 (300 °C)            | [158] |
| Chicken breast                          | NRK                                      | Annexin V-FITC/PI | 1.0                    | 12               | 74.8 (200 °C), 48.8 (300 °C)                     | [159] |
| Pork                                    | BALB/c Mice/ <i>C. elegans</i>           | Oral              | 2000 <sup>a</sup> / 10 | 24/ 96           | No acute toxicity/toxicity                       | [164] |
| Honey                                   | Seeds (soya bean, spanish)               | External          | 10                     | 1–8 <sup>b</sup> | Non-toxic                                        | [166] |
| Bee pollens                             | A549, HepG2                              | TE                | 0.5                    | 24               | > 100 <sup>c</sup> (both cells)                  | [167] |
| Bee pollen (water)                      | SHSY5Y, RAW264.7, HeLa, HCT-116, HepG2   | MTT               | 0.4                    | 24               | > 100 (first two cells), < 85 (last three cells) | [172] |
| Bee pollen (ethanol)                    | "                                        | "                 | "                      | "                | < 90 (all cells)                                 |       |
| Shrimp egg                              | SK-Hep-1                                 | MTT               | 0.2                    | 24               | > 97                                             | [173] |
| Dried shrimp                            | MCF-7                                    | MTT               | 0.01/ 0.5              | 24/ 24           | 104/ 6.0                                         | [177] |
| Crab shell + GdCl <sub>3</sub>          | HeLung, HeLa, HepG2                      | MTT               | 1.0                    | 24               | > 90 (all cells)                                 | [178] |
| Crab shell                              | HeLa                                     | MTT               | 1.0                    | 24               | > 90                                             | [179] |
| Crayfish shell                          | HeLa                                     | MTT               | 0.55                   | 24               | 91.76                                            | [185] |
| Mussel seafood                          | HepG2                                    | MTT               | 6.0                    | 24               | > 100                                            | [188] |
| Milk                                    | U87                                      | CCK-8             | 1.0                    | 24               | > 100                                            | [189] |
| Milk                                    | U87 MG                                   | MTT               | 0.3                    | 72               | > 90                                             | [193] |
| Milk                                    | HeLa                                     | MTT               | 0.2                    | 24               | > 95                                             | [194] |
| Milk                                    | BALB/c Mice                              | Oral              | 200 <sup>a</sup>       | 14 <sup>b</sup>  | No acute toxicity                                | [195] |
| Cow milk                                | HT22                                     | Invitrogen        | 0.4–40                 | 24               | < 60                                             | [197] |
| Pasteurized milk                        | HeLa                                     | MTT               | 0.1                    | 24               | 97.3–95.1 (CDs), 93 (Lis-CDs)                    | [201] |
| Expired milk                            | HeLa/BMSCs P2                            | CCK-8             | 0.3/ 0.4               | 6/ 48            | > 95 (both cells)                                | [202] |
| Denatured sour milk                     | U-251 MG                                 | CCK-8             | 1.0                    | 72               | 85                                               | [204] |
| Pigeon feather                          | HUVEC                                    | MTT               | 0.2                    | 24               | 96                                               | [134] |
| Pig skin                                | HeLa                                     | MTT               | 0.1/ 0.8               | 24/ 24           | 100/ 82                                          | [208] |
| Pig skin collagen                       | RL-14                                    | TC10              | 0.5                    | 24               | > 95.0                                           | [211] |
| GGEC                                    | Melanoma                                 | MTT               | 1.0                    | 24               | > 90                                             | [216] |
| Chicken cartilage                       | HCT-116, MC, Hepa 1-6                    | CCK-8             | 0.2                    | 24               | > 80 (all cells)                                 | [217] |
| Chicken bone                            | Hepa 1-6, HCT-116, MEFs                  | CCK-8             | 0.2                    | 48               | ~ 100 (all cells)                                | [218] |
| Cow manure                              | MCF-7, HUVEC, MDA-MB-231, Caco-2, DU-145 | MTT               | 2.5                    | 24               | > 95 (all cells)                                 | [219] |
| Cow manure                              | B16F10, NIH3T3                           | MTT               | 0.1                    | 24               | 60–70 (both cells)                               | [220] |
| Fish scale (grass carp)                 | PC-12                                    | MTT               | 0.4                    | 24               | > 90                                             | [223] |
| Fish scale (grass carp)                 | BV2                                      | MTT               | 100                    | 24               | ~ 96                                             | [224] |
| Fish scale (crucian carp)               | PC-12                                    | MTT               | 0.5                    | 24               | ~ 99                                             | [225] |
| Fish scale ( <i>Lethrinus lentjan</i> ) | hMSCs                                    | MTT               | 0.2                    | 24/ 48           | ~ 93 (both times)                                | [226] |

|                      |                                 |       |          |        |                                                              |       |
|----------------------|---------------------------------|-------|----------|--------|--------------------------------------------------------------|-------|
| Carp roe             | HCT-116, MC                     | CCK-8 | 0.2      | 60     | > 90 (both cells)                                            | [233] |
| Sheep wool           | HeLa                            | MTT   | 0.8      | 24     | > 86                                                         | [235] |
| Hair                 | HeLa                            | MTT   | 0.2      | 48     | ~ 84                                                         | [239] |
| Hair                 | HepG2                           | MTT   | 0.4      | 24     | > 85                                                         | [243] |
| Urine                | BT-474                          | SRB   | 0.5      | 48     | > 90                                                         | [244] |
| Urine + Citron juice | HeLa                            | MTT   | 0.1/ 1.0 | 24     | 92/ 82                                                       | [245] |
| Urine                | NRK                             | HP    | 0–0.5    | 12     | 0.15–0.6 <sup>d</sup> (UCDs), 0.15–0.33 <sup>d</sup> (HUCDs) | [246] |
| Fingernail           | HeLa, A549, MDA-MB-231, HEK-293 | CV    | 0.2      | 48     | ~ 98 (all cells)                                             | [247] |
| Fingernail           | A549, HeLa, MDA-MB-231, HEK-293 | CV    | 0.2      | 24/ 48 | > 100 (all cells, both times)                                | [248] |

**Note:** HeLa: human cervical cancer cell lines, KB: human epithelial carcinoma cell lines, Bcap-37: human breast cancer cell lines, BEAS-2B: human bronchial epithelial cell lines, A549: human lung adenocarcinoma epithelial cancer cell lines, HepG2: human hepatocellular liver carcinoma cell lines, MCF-7: human breast cancer cell lines, HEK-293: human embryonic kidney cell lines, MC3T3-E1: mouse osteoblast cell lines, PC-12: rat pheochromocytoma cell lines, NRK: normal rat kidney cells, SHSY5Y: human neuroblastoma cell lines, RAW264.7: mouse monocyte/ macrophage cell lines, HCT-116: human colorectal carcinoma cell lines, SK-Hep-1: human hepatic adenocarcinoma cell lines, HeLung: human embryo lung normal cells, U87/ U-87 MG/ U-251 MG: human brain glioblastoma cells, HT22: mouse hippocampus cell lines, BMSCs P2: mouse bone marrow mesenchymal stem cells, HUVEC: human umbilical vein endothelial cell lines, RL-14: human fetal ventricular cardiomyocytes cell lines, MC: mouse cardiomyocyte cells, Hepa 1-6: murine hepatoma cell lines, MEFs: mouse embryonic fibroblasts, MDA-MB-231: human breast cancer cell lines, Caco-2: colon carcinoma cell lines, DU-145: prostate cancer cell lines, B16F10: murine melanoma cells, NIH3T3: fibroblast cells, BV2: microglial cells derived from murine, hMSCs: human mesenchymal stem cells, BT-474: human mammary gland breast/ duct carcinoma cell lines, MTT: 3-(4,5-dimethylthiazol-2-yl)-2,5-diphenyltetrazolium bromide assay, CCK-8: cell counting kit-8, FITC: fluorescein isothiocyanate, PI: propidium iodide, TE: trypsin-EDTA, TC10: automated cell counter, SRB: sulforhodamine B assay, HP: hoechst 33, 342 + propidium iodide, CV: crystal violet assay, <sup>a</sup>: mg kg<sup>-1</sup> of mice, <sup>b</sup>: days, <sup>c</sup>: % proliferation, <sup>d</sup>: ratio of dead to live cells.
